# Supplementary material for: Ion Channels: New Actors Playing in Chemotherapeutic Resistance
Source: MDPI journal article supplement (doi:10.3390/cancers11030376), 2019-03-16
Supplement: s1 [file s1]

# Supplementary materials: Ion Channels: New Actors Playing in Chemotherapeutic Resistance

Philippe Kischel, Alban Girault, Lise Rodat-Despoix, Mohamed Chamlali, Silviya Radoslavova, Hiba Abou Daya, Thibaut Lefebvre, Arthur Foulon, Pierre Rybarczyk, Frédéric Hague, Isabelle Dhennin-Duthille, Mathieu Gautier and Halima Ouadid-Ahidouch

Table S1: Ion channels and associated mechanisms/signalling pathways involved in chemoresistance.

| Ion channels            | Cancer models             | Drugs                                     | Mechanisms and signalling pathways                                                                                                                      | PMID     |
|-------------------------|---------------------------|-------------------------------------------|---------------------------------------------------------------------------------------------------------------------------------------------------------|----------|
| <b>Calcium channels</b> |                           |                                           |                                                                                                                                                         |          |
| STIM1                   | Osteosarcoma              | Cisplatin                                 | High activity (Increase of SOCE) associated with resistance to drug mediated apoptosis                                                                  | 28326487 |
| Orai1                   | Pancreatic adenocarcinoma | 5-FU<br>Gemcitabin                        | High activity (SOCE) due to an overexpression linked to an increase in both survival and resistance to apoptosis                                        | 24583265 |
|                         | Ovarian carcinoma         | Cisplatin                                 | Overexpression associated with low sensitivity. Overexpression of Orai1 is regulated by the Akt signaling pathway                                       | 25015419 |
|                         | Hepatocarcinoma           | 5-FU                                      | Orai1 expression associated with chemoresistant phenotype<br>Orai1 mediated entry blocks 5-FU induced autophagy via the PI3K/Akt/mTOR signaling pathway | 27878958 |
|                         | Prostate cancer           |                                           | Downregulation of Orai1 (or STIM1) lead to a decrease in SOCE and an adaptation of the ER in apoptosis-resistant cells                                  | 12086875 |
|                         |                           |                                           | Low expression of Orai1 contributes to the establishment of an apoptosis-resistant phenotype                                                            | 14685164 |
| Orai3                   | ER+ breast cancer         | 5-FU<br>Cisplatin<br>Paclitaxel           | Orai3 overexpression revealed chemoresistance via an activation of PI3K pathway leading to a degradation of P53                                         | 21364678 |
|                         | Prostate cancer           |                                           | Orai3 overexpression impairs the Orai1-mediated SOCE and causes resistance                                                                              | 29323264 |
| TRPV1                   | Breast cancer             | 5-FU                                      | 5-FU-induced cell death is up-regulated by TRPV1 activation                                                                                             | 24954132 |
| TRPV2                   | Glioblastoma              | Temozolomide<br>Carmustine<br>Doxorubicin | Targeting of TRPV2 by an agonist increases the chemosensitivity of cells                                                                                | 28795251 |
|                         | Multiple myeloma          |                                           | TRPV2 activation increases cytotoxicity                                                                                                                 | 23079154 |
| TRPM2                   | Gastric cancer            | Paclitaxel                                |                                                                                                                                                         | 24293211 |
|                         |                           |                                           |                                                                                                                                                         | 29343514 |

|                    |                          |                                                     |                                                                                                                                                               |                      |
|--------------------|--------------------------|-----------------------------------------------------|---------------------------------------------------------------------------------------------------------------------------------------------------------------|----------------------|
|                    |                          | Doxorubicin                                         | TRPM2 downregulation increases sensitivity to drugs. TRPM2 promotes survival by activating Akt/JNK signaling pathway                                          |                      |
|                    | Breast cancer            | Doxorubicin<br>N-methyl-N'-nitro-N-nitrosoguanidine | Knockdown of TRPM2 enhances chemotherapy-induced cytotoxicity                                                                                                 | 26178079             |
| TRPM8              | Osteosarcoma             | Epirubicin                                          | Knockdown of TRPM8 enhances chemotherapy-mediated apoptosis through the Akt/GSK-3beta signaling pathway                                                       | 24391455             |
| TRPC1              | Ovarian cancer           | Cisplatin<br>Carboplatin                            | Downregulation of TRPC1 contributes to drug resistance by regulating autophagy                                                                                | 26647723             |
| TRPC5              | Breast cancer            | Doxorubicin                                         | TRPC5-induced autophagy promotes chemoresistance to doxorubicin through CAMHHbeta/AMPKalpha/mTOR signaling pathway                                            | 28600513             |
|                    |                          |                                                     | TRPC5 induces chemoresistance in breast cancer cells by upregulating MDR1 through activation of NFATc3                                                        | 22988121<br>24582564 |
|                    | Colorectal cancer        | 5-FU                                                | TRPC5 overexpression induces Wnt/beta-catenin signaling pathway and upregulates MDR1                                                                          | 25404731             |
|                    |                          |                                                     | Glycolysis plays a role in TRPC5-induced chemoresistance                                                                                                      | 29463225             |
| TRPC6              | Hepatocellular carcinoma | Doxorubicin<br>Cisplatin<br>5-FU                    | TRPC6 overexpression lead to an accumulation of intracellular calcium which activates a STAT3-dependant signaling pathway and conferring multidrug resistance | 27011063             |
|                    | Multiple cancer models   | GaQ3                                                | TRPC6 expression lead to a Ca <sup>2+</sup> -dependent apoptosis                                                                                              | 23976973             |
| VGCC alpha2delta1  | Lung cancer              | Etoposide                                           | Expression associated to a chemotherapeutic resistance regulated by ERK signaling pathway                                                                     | 29437792             |
| T-Type VGCC        | Ovarian cancer           | Cisplatin                                           | T-Type calcium channel expression associated with chemoresistance through AK/FOXO/FOXO1 signaling pathway                                                     | 26832797             |
| IP3R1              | Bladder cancer           | Cisplatin                                           | Reduced IP3R1 expression promotes chemoresistance to cisplatin                                                                                                | 15608674             |
| IP3R               | Pulmonary cancer         | Cisplatin                                           | Elevated IP3R expression associated to low chemoresistance to cisplatin                                                                                       | 19633366             |
| Potassium channels |                          |                                                     |                                                                                                                                                               |                      |
| Kv1.1 and Kv1.3    | Multiple cancer models   | Staurosporine, Ceramide and Cisplatin               | Low expression associated to low sensitivity                                                                                                                  | 23701546             |
| Kv1.5              | Gastric cancer           | Adriamycin                                          | Low expression associated to low sensitivity                                                                                                                  | 17428690             |
| hEAG1              | Ovarian cancer           | Cisplatin                                           | High expression associated with high resistance                                                                                                               | 26079730             |

|                                                           |                                   |                                                         |                                                                                                                              |          |
|-----------------------------------------------------------|-----------------------------------|---------------------------------------------------------|------------------------------------------------------------------------------------------------------------------------------|----------|
|                                                           | Glioblastoma                      | Telozomide,<br>Etoposide and<br>Imatinib                | Reduced miR-296-3p expression increases hEAG1 to improve resistance                                                          | 22999387 |
|                                                           | Acute myeloid<br>leukemia         | Idarubicin,<br>Etoposide,<br>Cytarabine,<br>Doxorubicin | High expression associated with high resistance                                                                              | 20105281 |
| hERG/Kv11.1                                               | Multiple cancer<br>models         | Vincristin,<br>Paclitaxel,<br>Hydroxy-<br>camptothecin  | Low expression associated to low sensitivity                                                                                 | 15812674 |
|                                                           | Gastric cancer                    | Cisplatin                                               | Channel activity associated to caspase apoptotic pathway involved in<br>cisplatin response                                   | 22020779 |
|                                                           | Acute lymphoblastic<br>leukemia   |                                                         | Regulation of chemoresistance through the association with bone<br>marrow mesenchymal cells                                  | 21048156 |
| hERG and<br>TWIK-2                                        | Epidermal and liver<br>carcinomas | Cisplatin                                               | High expression associated with high resistance                                                                              | 16309205 |
| Ca <sup>2+</sup> -<br>dependent K <sup>+</sup><br>channel | Cervical cancer                   | Cisplatin                                               | Channel activity associated to cisplatin response                                                                            | 17592515 |
|                                                           | Ovarian cancer                    |                                                         | Low expression associated to low sensitivity                                                                                 | 29901154 |
| SK3                                                       | Colorectal cancer                 | Cetuximab                                               | K <sup>+</sup> channel inhibition potentiates Cetuximab efficiency <i>via</i> EGFR-AKT<br>pathway modulation                 | 27102434 |
|                                                           | Lung epidermoid<br>cancer         | Cisplatin                                               | Channel activity associated to cisplatin response through apoptotic<br>pathway (RVD, caspase modulation)                     | 18367588 |
|                                                           | Glioma and colon<br>cancer        | Oxaliplatin                                             | Channel activity associated to oxaliplatin response                                                                          | 26488725 |
| KCa3.1                                                    | Melanoma                          | Vemurafenib                                             | Channel inhibition potentiates apoptosis through regulation of Bcl-2<br>family                                               | 28151482 |
|                                                           | Melanoma                          | TRAIL                                                   | Channel activity link to mitochondrial apoptosis pathway; KCa3.1<br>inhibition potentiates TRAIL efficiency                  | 22723988 |
| KCa3.1 and<br>Kv11.1                                      | Colorectal cancer                 | Cisplatin                                               | High expression associated with high resistance; modulation of the<br>AKT/ERK and the caspase 3 pathways                     | 29161243 |
| BKCa                                                      | Ovarian cancer                    | Cisplatin                                               | Low expression associated to low sensitivity, association between miR-<br>31 expression, BKCa expression and chemoresistance | 26386726 |

|                                            |                             |                            |                                                                                                        |          |
|--------------------------------------------|-----------------------------|----------------------------|--------------------------------------------------------------------------------------------------------|----------|
| BKCa (and Kv type channel)                 | SCLC <sup>1</sup>           |                            | Low expression associated to low sensitivity                                                           | 16883578 |
| Inwardly rectifying K <sup>+</sup> channel | SCLC <sup>1</sup>           |                            | Increased channel activity associated to increased resistance                                          | 8395978  |
| Kir2.1                                     | SCLC <sup>1</sup>           |                            | Kir2.1 expression/activity increases MRP1/ABCC1 expression; Kir2.1 regulation by RAS/MAPK and MiR-7    | 25880778 |
| 4-AP/TEA-sensitive K <sup>+</sup> channel  | Lung cancer                 | Gefitinib                  | K <sup>+</sup> channel inhibition potentiates Gefitinib efficiency via EGFR-Ras-Raf pathway modulation | 28219421 |
| <b>Magnesium channels</b>                  |                             |                            |                                                                                                        |          |
| TRPM6/TRPM7                                | Colon cancer                | Doxorubicin                | Low expression associated to resistance                                                                | 26563869 |
| Mrs2                                       | Gastric cancer              | Adriamycin                 | High expression associated to apoptosis resistance and cell proliferation                              | 19242098 |
| ??                                         | Myelogenous leukemia        | Vincristine                | Mg <sup>2+</sup> needed for MDR-1 drug binding and extrusion                                           | 2900677  |
| ??                                         | Ovarian and cervical cancer | Cisplatin                  | Mg <sup>2+</sup> needed for PPM1D dependent drug-resistance                                            | 25154814 |
| <b>Chloride channels</b>                   |                             |                            |                                                                                                        |          |
| VRAC                                       | Breast cancer               | Doxorubicin                | MDR1 expression regulates chloride current in resistant cells (reduced AVD)                            | 16039989 |
|                                            | Epidermoid cancer           | Cisplatin                  | Reduced VRAC expression promotes resistance (reduced AVD)                                              | 17186499 |
|                                            | Lung adenocarcinoma         | Cisplatin                  | Reduced VRAC expression promotes resistance (reduced AVD)                                              | 21454376 |
|                                            | Ehrlich ascites model       | Cisplatin                  | Reduced VRAC expression promotes resistance (reduced AVD)                                              | 19846756 |
|                                            | Nasopharyngeal carcinoma    | Cisplatin                  | VRAC activity through P2Y pathway modulates sensitivity                                                | 25236172 |
| ANO1                                       | Breast cancer               | Trastuzumab                | Transcriptional regulation of HER2                                                                     | 27838298 |
|                                            | HNSCC <sup>2</sup>          |                            | ANO1 expression correlates with response to anti-EGFR therapy                                          | 25823819 |
| CLIC1                                      | Glioblastoma                | BCNU                       | Increased activity increases resistance                                                                | 18590702 |
|                                            | Ovarian cancer              |                            | Increased expression increases resistance                                                              | 27825122 |
|                                            | Choriocarcinoma             | Methotrexate / Floxuridine | Increased expression associated to up-regulation of MRP1                                               | 27983917 |

|             |                      |                         |                                                                                   |          |
|-------------|----------------------|-------------------------|-----------------------------------------------------------------------------------|----------|
| CIC-3       | Neuroendocrine tumor | Etoposide               | Acidification of intracellular compartment induces drug chelation                 | 17363491 |
|             | Erythroleukemia      | Cisplatin               | Acidification of intracellular compartment induces drug chelation                 | 21538933 |
|             | Glioma               | Cisplatin               | Expression associated to cisplatin resistance                                     | 29963152 |
|             | Glioma               | Cisplatin               | Regulation of Akt and autophagy pathways                                          | 23408563 |
|             | Lung adenocarcinoma  | Paclitaxel/Doxo rubicin | Up-regulation of NF-kB-signaling dependent P-gp expression                        | 30230544 |
| CIC-5       | Myeloma              | Bortezomib              | CIC5 promotes prosurvival autophagy by inhibiting Akt-mTOR pathway                | 28899456 |
| ANO1 / CIC3 | Breast cancer        |                         | Chloride level impacts PI3K/Akt and STAT3 pathways to regulate HER2 transcription | 29949674 |

<sup>1</sup> SCLC: Small Cell Lung Carcinoma

<sup>2</sup> HNSCC: Head and Neck Squamous Cell Carcinoma

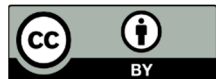

© 2019 by the authors. Licensee MDPI, Basel, Switzerland. This article is an open access article distributed under the terms and conditions of the Creative Commons Attribution (CC BY) license (<http://creativecommons.org/licenses/by/4.0/>).
